# Supplementary material for: Chemical-induced gene expression ranking and its application to pancreatic cancer drug repurposing
Source: PubMed Central journal article supplement — Patterns (N Y). 2022 Feb 4;3(4):100441. doi: 10.1016/j.patter.2022.100441 (PMC9023899; doi:10.1016/j.patter.2022.100441), 2022-02-04
Supplement: mmc1.pdf [file mmc1.pdf]

**Patterns, Volume 3**

**Supplemental information**

**Chemical-induced gene expression ranking  
and its application to pancreatic  
cancer drug repurposing**

**Thai-Hoang Pham, Yue Qiu, Jiahui Liu, Steven Zimmer, Eric O'Neill, Lei Xie, and Ping Zhang**

## Supplemental Notes

### *Supplemental Note 1: Random Ranking Method*

The random ranking method can be seen as the random permutation over the gene sequence. Thus, its performances measured by Precision@K can be computed theoretically. In particular, Precision@K returned by the random ranking method can be seen as the random variable  $X = Y/K$  where  $Y$  follows the hypergeometric distribution  $f(y|A, N, n)$  with  $A = K$  is the number of top-K regulated genes,  $N = n_g$  is the number of genes, and  $n = K$  is number of top regulated genes in predicted profiles used to compute Precision@K. Then the average performance of the random ranking method measured by Precision@K is computed as  $\bar{X} = \frac{Y}{K} = \frac{nA}{NK} = \frac{K}{n_g}$ . For measuring performances by NDCG we run random ranking method 100 times for each gene expression profile and return the average results.

### *Supplemental Note 2: Details of Data-driven Graph-based Fingerprint (Neural Fingerprint)*

The pseudo-code of data-driven graph-based fingerprint generated by graph convolutional network is shown in Algorithm 1. In general, graph convolutional network updates the representation of one particular nodes from information of its neighborhoods in the graph by convolutional operation so each node in the output layer represents the sub-structure of the original graph. Follow the setting in [1], we use the 2-layer graph convolutional network (radius = 2) which means that the sub-structures represented by this method are the span of 2-hop distance from the atom. Inputs for graph convolutional network are the feature vectors of atoms and bonds that captures their properties such as atom symbol, degree, and type of bonds. The dimension of fingerprints generated by graph convolutional network is set to be 1024 which is similar to ECFP for a fair comparison.

### *Supplemental Note 3: Learning-to-rank Objective Functions*

CIGER treats the gene expression profiles as the lists ranked by their z-score values and then minimizes several learning-to-rank objective functions including both pair-wise (i.e. RankNet) and list-wise (i.e. ListNet, ListMLE, and RankCosine) functions between the predicted ( $\mathbf{Y}$ ) and the ground-truth ( $\mathbf{Z}$ ) gene expression profiles. The details of these learning-to-rank objective functions are presented in the following paragraphs.

*ListNet.* [2] is the list-wise ranking objective function that minimizes the cross-entropy loss between top-1 probability of the predicted and ground-truth gene expression profiles. In particular, the top-1 probability of gene  $i$  in the gene expression profile  $j$  is the probability of that gene being ranked first among all genes in that profile and is computed as follows:

$$P_{top-1}^{z^{(j)}}(x_i^{(j)}) = \frac{\exp(z_i^{(j)})}{\sum_{k=1}^{n_g} \exp(z_k^{(j)})}$$

---

**Algorithm 1:** Pseudo-code of data-driven graph-based fingerprint

---

**Input:** Chemical graph =  $(V, E)$ , radius  $R$ , hidden weights  $(\mathbf{H}_1^1, \dots, \mathbf{H}_R^5)$ ,  $(\mathbf{U}_1, \dots, \mathbf{U}_l)$ ,  $(\mathbf{W}_1, \dots, \mathbf{W}_l)$   
**Output:** Neural fingerprint  $\mathbf{f}$   
**for**  $l = 1$  **to**  $R$  **do**  
    **for**  $i = 1$  **to**  $|V|$  **do**  
         $V_{neighbor}, E_{neighbor} \leftarrow Neighbors(\mathbf{v}^{(i)});$   
         $\mathbf{v}_l^{(i)} \leftarrow \sum_{\mathbf{v}^{(j)} \in V_{neighbor}} \mathbf{v}_{l-1}^{(j)};$   
         $\mathbf{e}_l^{(i)} \leftarrow \sum_{\mathbf{e}^{(j)} \in E_{neighbor}} \mathbf{e}_0^{(j)};$   
         $\mathbf{v}_l^{(i)} \leftarrow concat(\mathbf{v}_l^{(i)}, \mathbf{e}_l^{(i)});$   
         $\mathbf{v}_l^{(i)} \leftarrow ReLU(\mathbf{v}_{l-1}^{(i)} \mathbf{U}_l + (\mathbf{v}_l^{(i)} \mathbf{W}_l));$   
         $\mathbf{v}_l^{(i)} \leftarrow softmax(\mathbf{v}_l^{(i)} \mathbf{H}_l^{|V_{neighbor}|});$   
         $\mathbf{f} \leftarrow \mathbf{f} + \mathbf{v}_l^{(i)};$   
    **end**  
**end**

---

and then ListNet minimizes the loss:

$$L_{ListNet} = - \sum_{j=1}^{n_b} \sum_{k=1}^{n_g} P_{top-1}^{z^{(j)}}(x_i^{(j)}) \log(P_{top-1}^{y^{(j)}}(x_i^{(j)}))$$

*ListMLE.* [3] is the list-wise ranking objective function that maximizes the likelihood of the rank given the list of gene expression values. In particular, let  $\pi^{(j)}$  is the ranked list given the gene expression profile  $\mathbf{z}^{(j)}$ , the negative log-likelihood of the ranked lists is computed as follows:

$$L_{ListMLE} = - \sum_{j=1}^{n_b} \sum_{i=1}^{n_g} \frac{\exp(y_{\pi_i^{(j)}}^{(j)})}{\sum_{k=i}^{n_g} \exp(y_{\pi_k^{(j)}}^{(j)})}$$

*RankCosine.* [4] is the list-wise ranking objective function that measures the cosine similarity between the predicted and ground-truth ranking lists. In particular, this score is computed as follows:

$$L_{RankCosine} = \frac{1}{2} \sum_{j=1}^{n_b} \left( 1 - \frac{\mathbf{z}^{(j)T} \mathbf{y}^{(j)}}{\|\mathbf{z}^{(j)}\| \|\mathbf{y}^{(j)}\|} \right)$$

*RankNet.* [5] is the pair-wise ranking objective function that considers the ranking between every pairs of genes. In particular, given the ranked list  $\pi^{(j)}$  of gene expression profiles  $\mathbf{z}^{(j)}$ , RankNet is computed as the cross-entropy loss between predicted and ground-truth pair-wise ranked probabilities as follows:

$$L_{RankNet} = \sum_{j=1}^{n_b} \sum_{i,k=1}^{n_g} -\hat{P}_{ik}^{(j)} \log(P_{ik}^{(j)}) - (1 - \hat{P}_{ik}^{(j)}) \log(1 - P_{ik}^{(j)})$$

where  $\hat{P}_{ik}^{(j)}$  and  $P_{ik}^{(j)}$  are the ground-truth and predicted probabilities that gene  $i$  is ranked higher than gene  $k$  and are computed as follows:

$$\hat{P}_{ik}^{(j)} = \frac{1}{2}(1 + S_{ik}^{(j)})$$

$$P_{ik}^{(j)} = \frac{1}{1 + \exp(-(y_i^{(j)} - y_k^{(j)}))}$$

where  $S_{ik}^{(j)} = 1$  if gene  $i$  is ranked higher than gene  $k$  in the ranked list  $\pi^{(j)}$ , -1 if gene  $k$  is ranked higher, and 0.5 if they are ranked equally.

#### *Supplemental Note 4: Details of Methods for Experimental Validation*

##### *Cell Culture*

PANC-1 and PSN-1 cells were obtained from ATCC. Cells were cultured in complete Dulbecco's Modified Eagle Medium (DMEM) (Gibco, Cat No.21969-035 USA) with 10% Fetal Bovine Serum (FBS), 2mM L-Glutamine (Gibco, USA) and 50u/ml penicillin/streptomycin (Gibco, ref 15140-122, USA). Cells were cultured at 37°C with 5% CO<sub>2</sub> in a humidified incubator. To harvest cells, media was removed, and cells were washed with PBS and trypsinised with 2-4 ml trypsin (Gibco, Cat No. 25200-056, USA) and incubated for 4 minutes to detach. Trypsin was then neutralised by adding 8-10 ml complete media and cells were collected and counted using countess (C10283 Fisher Scientific, Rockford, IL, USA) following manufacturer's protocol.

##### *Drugs and Reagents*

*Drugs for Treatment.* Drugs used with their stock and working concentrations are summarised in Supplemental Table S7.

*Antibody and Enzymes.* Antibodies, enzymes used in western blot and dot blot are summarised in Supplemental Table S8. TET2 and GATA6 primary antibodies were obtained from Abcam (Cambridge, UK) and used at dilution of 1:500. 5hmc was obtained from Active motif (California, USA) and used at dilution 1:1000. Beta-actin was obtained from Proteintech (USA) and used at 1:1000. Anti-ribbit HRP (7074S, Cell Signalling Technology Danvers, USA) and anti-mouse HRP (7076S, Cell Signalling Technology Danvers, USA) were used at dilution of 1:5000. RNA A (EN0531, Thermo Scientific, Waltham, USA), used at concentration of 200  $\mu\text{g/ml}$ /1x10<sup>6</sup> cells based on previous study [6].

*Buffer and Solution.* Buffer and solution used are summarised in Supplemental Table S9. NuPAGE Sample buffer (NP008, Thermo Scientific, Waltham, USA) and NuPAGE running buffer (NP0001-02, Thermo Scientific, Waltham, USA) were used for western blot. Transfer buffer, lysis buffer, denaturing buffer and TBST were prepared as described [7]. Transfer buffer was prepared as 10x stock solution containing 144g Glycine, 30.2g tris base. Lysis buffer contained 100mM

Tris-HCL [pH8.5], 5mM EDTA, 0.2% SDS, 100mM NaCl, 0.5mg/ml Proteinase K, denaturing buffer was made up of 200mM NaOH, 20mM EDTA and TBS-0.1% Tween 20 was made with 6.05 Tris 8.76g NaCl, pH 7.6, with 0.1% Tween 20 (Acros Organics Cat No. 233360010, BVBA, Geel, Belgium). Ripa Buffer (Ref 89900 Thermo Scientific, Waltham, USA) included protease inhibitor (Ref 04693116001, Roche, Basel, Switzerland) and phosphate inhibitor (Ref A32957, Pierce, Thermo Scientific, Waltham, USA).

#### *Protein Isolation and Western Blotting*

*Protein Isolation and Normalisation.* Protein isolation was performed as described published [7]. Briefly, cells are harvested and washed twice in cold PBS. PBS was removed by spinning at 350 rpm for 5 minutes and for every 1,000,000 cells 100  $\mu$ l Ripa Buffer supplemented with protease inhibitor (Ref 04693116001, Roche, Basel, Switzerland) and phosphate inhibitor (Ref A32957 Pierce Thermo Scientific, Waltham, USA) (as described in Supplemental Table S8) was added and cells were lysed for 15 minutes while rotating at 4°C. Samples were then spined at 13000 rpm for 10 minutes and protein lysate was collected. Lysate obtained was quantified using BCA kit (Ref 23225, Thermo Scientific, Waltham, USA) with albumin standard (Ref 23209 Thermo Scientific, Waltham, USA) in 96-well flat bottom plates (Geriner Bio-one Ref. 655080) following manufacturer's protocol. Results were read and analysed using POLARstar Omega Plate Reader and protein was normalised.

*Western Blot.* Western blots were performed and analysed as published [7]. Briefly, lysate containing 50  $\mu$ g protein was mixed with 4X NuPAGE LDS Sample Buffer (NP0008, Thermo Scientific, Waltham, USA) with 1 mM DTT and boiled at 95°C for 5 minutes. Samples were run on 4%-12% NuPAGE Bis-Tris gels (Cat. No NP0335BOX, Thermo Scientific, Waltham, USA) in 1X NuPAGE MOPS SDS Running Buffer (NP0001-02, Thermo Scientific, Waltham, USA) for 100 minutes at 150 V. Proteins were then transferred onto Polyvinylidene Difluoride (PVDF) membranes (IPVH00010, Sigma, St Louis, MO, USA) in transfer buffer (Described in Supplemental Table S8). PVDF membranes were activated in 100% methanol 10 minutes before transfer and methanol was washed off and replaced with transfer buffer. Proteins were then transferred in transfer buffer for 90 minutes at 100V. Membrane was checked using Ponceau S staining (P7170-1L, Sigma, St Louis, MO, USA) by incubating in 3ml Ponceau S staining, followed by 3 x 5 minutes wash. Membranes were then blocked using 3% milk in TBS with 0.1% Tween20 (TBST) for 1 hour. Primary antibody (As described in Supplemental Table S8) was then diluted in 3% milk in TBST, and membranes were cut and incubated in corresponding antibody overnight at 4°C. Membranes were then washed 3 x 10-15 minutes in TBST and incubated in secondary antibody (As describe in Supplemental Table S8) at 1:5000 in 3% milk and TBST for 1 hour at room temperature followed by 3 x 10-15 minutes wash in TBST. To develop, membranes were incubated in enhanced chemiluminescence kits (ECL) (Millipore, Burlington, MA, USA) for

1 minute. Excess substrate was drained off and signals were immediately developed using CL-Xposure film (Ref 34089 Thermo Scientific, Waltham, USA) with X-ray film processor (Ecomax 1186-3-4000) and detected using Chemidoc MP (Bio-Rad Laboratories, Hercules, CA, USA). For Chemidoc MP imaging, bands were processed using Image Lab Software (Bio-Rad Laboratories, Hercules, CA, USA). Western images were further analysed and quantified using ImageJ.

Loading controls were then checked and membranes were incubated in primary  $\beta$ -actin antibody (As described in Table Supplemental Table S8) in 1:1000 in 3% milk in TBST for 1 hour at room temperature and washed 3 X 10-15 minute in TBST. Secondary antibody incubation (As described in Supplemental Table S8) was then carried out in 1:5000 in 3% milk in TBST for 1 hour at room temperature and then washed 3 X 10-15 minute in TBST. Western blot signals were then developed and detected as mentioned above with ECL (Pierce, Thermo Scientific, Waltham, USA), and results were analysed using the same methods as above.

#### *DNA Isolation and Dot Blots*

*DNA Isolation.* DNA isolations were performed as published [7]. Briefly cells are trypsinised, collected and lysed in DNA lysis buffer (as described in Supplemental Table S9), and incubated at 55°C for 72 hours while shaking. Samples were centrifuged for 10 minutes at 13000 rpm and supernatant was removed. One volume of isopropanol was then added, and cells were incubated for 5 minutes at room temperature, centrifuged for 10 minutes at 12000 rpm at 4°C. Supernatant was removed and DNA pellet was washed and resuspended in 70% ethanol. Samples were centrifuged at 12000 rpm for 5 minutes at 4°C and supernatant was removed. Excess ethanol was left to evaporate, DNA pellet was resuspended in 50-100  $\mu$ l nuclease free water. RNase A digestion was then carried out with 200  $\mu$ l/ml RNase A added/one million cells for 2 hours. Genomic DNA (gDNA) was then sonicated using BRANSON digital sonifier 450 (appliance number:364) for 20 cycles of 30 seconds on and off at 10% highest power. DNA was then quantified using Nano Drop 1000 and normalised.

*Dot Blot.* Dot blots were performed as published [7]. Briefly, one volume of DNA denaturing buffer was added to the normalised DNA sample and heated at 95°C for 10 minutes. Two volumes of 20X Saline-sodium citrate (SSC) (ENZ-GEN426-0250, Enzo, New York, USA) were then added and samples were left to cool on ice for 5 minutes. Serial dilution of DNA was prepared with DNA amount ranging from 5  $\mu$ g to 0.2  $\mu$ g and samples were pipetted on to Amersham Hybond-N+ blotting paper (GE Healthcare GERPN203B) and left partially dry. Membranes were wrapped using Saran Wrap and crosslinked using XL-1500 UV Crosslinker (Spectrolinker, appliance number 537, USA) at 1200J/m<sup>2</sup>. Membrane was blocked in 5% milk in PBST for one hour, followed by overnight 5hmc primary antibody (As described in Supplemental Table S8) incubation at 4°C. On the following day, membrane was washed 3 x 10 minutes in TBST, followed by secondary antibody incubation (Describe in Supplemental Table S8)

and 3 x 10 minutes in TBST. Membrane was then developed and detected same as western blot using ECL (Millipore, Burlington, MA, USA). Results were then further analysed and quantified using ImageJ.

#### *Clonogenic*

Clonogenic assays were performed as previously described [8]. Briefly, cells were trypsinised, collected and counted as mentioned above. Cells were then seeded in different density ranging of 200 cell into 6-well plates and left to attach for four hours. Drugs are then added (as described in Supplemental Table S7) with 100  $\mu$ M linagliptin/well and 100  $\mu$ M Vitamin C and 20  $\mu$ M metformin/well. Cells were incubated overnight. Within 24 hours of seeding, cells received sham radiation. Cells were further incubated for 24 hours, and media was refreshed with at least 3 ml complete media added into each well. Cells were incubated for 13 days. Colonies were then stained using 0.4% methylene blue and colonies with more than 50 cells were counted. Results were analysed using Prism 9.

#### *Data and Image Analysis*

Western blot and dot blot images captured using Chemidoc were processed using Image Lab Software (Bio-Rad Laboratories, Hercules, CA, USA) and further analysed using ImageJ. Results developed using x-ray films were scanned and quantified using ImageJ. All results obtained were analysed and compared using GraphPad Prism version 9. All experiments were performed at least three times and results were analysed using either unpaired two-way t-tests, one-way ANOVA, or two-way ANOVA. Data was presented as mean  $\pm$  SD, and a threshold of  $p < 0.05$  was considered statically significant.

## Supplemental Tables

| Metrics | Models  | A375                   | A549                   | HAIE                   | HCC515                 | HELA                   | HT29                   | MCF7                   | PC3                    | VCAP                   | YAPC                   |
|---------|---------|------------------------|------------------------|------------------------|------------------------|------------------------|------------------------|------------------------|------------------------|------------------------|------------------------|
| NDCG    | TT-WOPT | 0.7421 ± 0.0041        | 0.7367 ± 0.0103        | 0.7423 ± 0.0035        | 0.7346 ± 0.0059        | 0.7303 ± 0.0111        | 0.7468 ± 0.0091        | 0.7415 ± 0.0036        | 0.7298 ± 0.0028        | 0.7371 ± 0.0066        | 0.7386 ± 0.0044        |
|         | DeepCOP | 0.8134 ± 0.0053        | 0.7880 ± 0.0091        | 0.7957 ± 0.0087        | 0.7960 ± 0.0031        | 0.8013 ± 0.0050        | 0.8253 ± 0.0073        | 0.8140 ± 0.0016        | 0.8123 ± 0.0044        | 0.8024 ± 0.0106        | 0.8152 ± 0.0086        |
|         | CIGER   | <b>0.8357 ± 0.0067</b> | <b>0.8188 ± 0.0129</b> | <b>0.8254 ± 0.0047</b> | <b>0.8089 ± 0.0058</b> | <b>0.8332 ± 0.0169</b> | <b>0.8362 ± 0.0115</b> | <b>0.8276 ± 0.0101</b> | <b>0.8267 ± 0.0034</b> | <b>0.8298 ± 0.0073</b> | <b>0.8315 ± 0.0074</b> |
| P@10    | TT-WOPT | 0.2601 ± 0.0225        | 0.2476 ± 0.0179        | 0.2713 ± 0.0243        | 0.2482 ± 0.0129        | 0.2482 ± 0.0426        | 0.2790 ± 0.0419        | 0.2612 ± 0.0212        | 0.2499 ± 0.0258        | 0.2624 ± 0.0304        | 0.2813 ± 0.0556        |
|         | DeepCOP | 0.5417 ± 0.0295        | 0.4935 ± 0.0592        | 0.5166 ± 0.0186        | 0.4975 ± 0.0187        | 0.5368 ± 0.0528        | 0.5865 ± 0.0201        | 0.5532 ± 0.0047        | 0.5757 ± 0.0323        | 0.5160 ± 0.0513        | 0.5913 ± 0.0447        |
|         | CIGER   | <b>0.6021 ± 0.0363</b> | <b>0.5468 ± 0.0631</b> | <b>0.5840 ± 0.0139</b> | <b>0.5365 ± 0.0292</b> | <b>0.6432 ± 0.0530</b> | <b>0.6055 ± 0.0481</b> | <b>0.5898 ± 0.0330</b> | <b>0.6232 ± 0.0164</b> | <b>0.6248 ± 0.0231</b> | <b>0.6290 ± 0.0159</b> |
| P@50    | TT-WOPT | 0.2423 ± 0.0178        | 0.2345 ± 0.0160        | 0.2499 ± 0.0149        | 0.2328 ± 0.0096        | 0.2301 ± 0.0332        | 0.2552 ± 0.0283        | 0.2396 ± 0.0151        | 0.2290 ± 0.0211        | 0.2363 ± 0.0214        | 0.2427 ± 0.0354        |
|         | DeepCOP | 0.4757 ± 0.0176        | 0.4373 ± 0.0428        | 0.4250 ± 0.0211        | 0.4267 ± 0.0136        | 0.4558 ± 0.0253        | 0.5122 ± 0.0179        | 0.4654 ± 0.0090        | 0.4951 ± 0.0246        | 0.4486 ± 0.0376        | 0.5072 ± 0.0301        |
|         | CIGER   | <b>0.5420 ± 0.0302</b> | <b>0.4994 ± 0.0453</b> | <b>0.5134 ± 0.0055</b> | <b>0.4768 ± 0.0228</b> | <b>0.5578 ± 0.0509</b> | <b>0.5421 ± 0.0328</b> | <b>0.5191 ± 0.0355</b> | <b>0.5451 ± 0.0188</b> | <b>0.5435 ± 0.0188</b> | <b>0.5408 ± 0.0141</b> |
| P@100   | TT-WOPT | 0.2316 ± 0.0138        | 0.2249 ± 0.0194        | 0.2368 ± 0.0142        | 0.2229 ± 0.0039        | 0.2185 ± 0.0252        | 0.2369 ± 0.0235        | 0.2289 ± 0.0121        | 0.2193 ± 0.0137        | 0.2295 ± 0.0164        | 0.2321 ± 0.0290        |
|         | DeepCOP | 0.4262 ± 0.0140        | 0.3902 ± 0.0345        | 0.3705 ± 0.0182        | 0.3856 ± 0.0072        | 0.4051 ± 0.0187        | 0.4613 ± 0.0185        | 0.4197 ± 0.0107        | 0.4418 ± 0.0193        | 0.4083 ± 0.0259        | 0.4395 ± 0.0215        |
|         | CIGER   | <b>0.4877 ± 0.0239</b> | <b>0.4545 ± 0.0380</b> | <b>0.4632 ± 0.0052</b> | <b>0.4324 ± 0.0160</b> | <b>0.4984 ± 0.0490</b> | <b>0.4898 ± 0.0288</b> | <b>0.4672 ± 0.0321</b> | <b>0.4851 ± 0.0125</b> | <b>0.4757 ± 0.0131</b> | <b>0.4806 ± 0.0131</b> |
| P@200   | TT-WOPT | 0.2211 ± 0.0114        | 0.2167 ± 0.0154        | 0.2258 ± 0.0104        | 0.2122 ± 0.0048        | 0.2087 ± 0.0184        | 0.2224 ± 0.0172        | 0.2193 ± 0.0099        | 0.2108 ± 0.0109        | 0.2185 ± 0.0127        | 0.2219 ± 0.0225        |
|         | DeepCOP | 0.3646 ± 0.0093        | 0.3389 ± 0.0228        | 0.3207 ± 0.0161        | 0.3339 ± 0.0068        | 0.3462 ± 0.0147        | 0.3931 ± 0.0129        | 0.3603 ± 0.0055        | 0.3722 ± 0.0119        | 0.3460 ± 0.0143        | 0.3687 ± 0.0150        |
|         | CIGER   | <b>0.4172 ± 0.0180</b> | <b>0.3879 ± 0.0252</b> | <b>0.3991 ± 0.0031</b> | <b>0.3716 ± 0.0134</b> | <b>0.4163 ± 0.0385</b> | <b>0.4174 ± 0.0219</b> | <b>0.3973 ± 0.0240</b> | <b>0.4070 ± 0.0085</b> | <b>0.3998 ± 0.0081</b> | <b>0.4119 ± 0.0072</b> |

Supplemental Table S1. Cell-specific performances (NDCG and Precision@K) of TT-WOPT, DeepCOP, and CIGER for up-regulated gene ranking under 5-fold cross-validation setting.

| Metrics | Models  | A375                   | A549                   | HAIE                   | HCC515                 | HELA                   | HT29                   | MCF7                   | PC3                    | VCAP                   | YAPC                   |
|---------|---------|------------------------|------------------------|------------------------|------------------------|------------------------|------------------------|------------------------|------------------------|------------------------|------------------------|
| NDCG    | TT-WOPT | 0.7625 ± 0.0033        | 0.7500 ± 0.0069        | 0.7583 ± 0.0043        | 0.7513 ± 0.0065        | 0.7500 ± 0.0084        | 0.7584 ± 0.0096        | 0.7477 ± 0.0038        | 0.7468 ± 0.0030        | 0.7508 ± 0.0083        | 0.7629 ± 0.0140        |
|         | DeepCOP | 0.8441 ± 0.0032        | 0.8212 ± 0.0092        | 0.8258 ± 0.0051        | 0.8202 ± 0.0123        | 0.8173 ± 0.0039        | 0.8372 ± 0.0047        | 0.8245 ± 0.0058        | 0.8278 ± 0.0053        | 0.8394 ± 0.0073        | 0.8470 ± 0.0037        |
|         | CIGER   | <b>0.8574 ± 0.0046</b> | <b>0.8378 ± 0.0096</b> | <b>0.8495 ± 0.0044</b> | <b>0.8251 ± 0.0087</b> | <b>0.8552 ± 0.0136</b> | <b>0.8519 ± 0.0053</b> | <b>0.8346 ± 0.0091</b> | <b>0.8412 ± 0.0015</b> | <b>0.8599 ± 0.0089</b> | <b>0.8625 ± 0.0028</b> |
| P@10    | TT-WOPT | 0.2916 ± 0.0093        | 0.2941 ± 0.0172        | 0.2984 ± 0.0072        | 0.2782 ± 0.0414        | 0.2657 ± 0.0499        | 0.3214 ± 0.0386        | 0.2806 ± 0.0160        | 0.2683 ± 0.0169        | 0.2893 ± 0.0298        | 0.2909 ± 0.0372        |
|         | DeepCOP | 0.6355 ± 0.0167        | 0.5473 ± 0.0625        | 0.5334 ± 0.0288        | 0.5262 ± 0.0506        | 0.5316 ± 0.0612        | 0.6052 ± 0.0333        | 0.5883 ± 0.0198        | 0.5793 ± 0.0353        | 0.6178 ± 0.0379        | 0.6368 ± 0.0202        |
|         | CIGER   | <b>0.6578 ± 0.0223</b> | <b>0.6151 ± 0.0611</b> | <b>0.6365 ± 0.0181</b> | <b>0.5472 ± 0.0329</b> | <b>0.6885 ± 0.0414</b> | <b>0.6522 ± 0.0258</b> | <b>0.6069 ± 0.0349</b> | <b>0.6198 ± 0.0201</b> | <b>0.6788 ± 0.0360</b> | <b>0.7004 ± 0.0520</b> |
| P@50    | TT-WOPT | 0.2708 ± 0.0032        | 0.2615 ± 0.0169        | 0.2653 ± 0.0117        | 0.2553 ± 0.0231        | 0.2480 ± 0.0362        | 0.2800 ± 0.0285        | 0.2611 ± 0.0111        | 0.2462 ± 0.0157        | 0.2674 ± 0.0305        | 0.2647 ± 0.0278        |
|         | DeepCOP | 0.5473 ± 0.0163        | 0.4946 ± 0.0415        | 0.4748 ± 0.0230        | 0.4740 ± 0.0409        | 0.4652 ± 0.0234        | 0.5489 ± 0.0291        | 0.5157 ± 0.0160        | 0.5177 ± 0.0269        | 0.5479 ± 0.0317        | 0.5561 ± 0.0153        |
|         | CIGER   | <b>0.5983 ± 0.0104</b> | <b>0.5523 ± 0.0436</b> | <b>0.5715 ± 0.0131</b> | <b>0.5038 ± 0.0267</b> | <b>0.6025 ± 0.0440</b> | <b>0.6019 ± 0.0220</b> | <b>0.5524 ± 0.0274</b> | <b>0.5655 ± 0.0074</b> | <b>0.6269 ± 0.0346</b> | <b>0.6162 ± 0.0132</b> |
| P@100   | TT-WOPT | 0.2562 ± 0.0034        | 0.2452 ± 0.0189        | 0.2494 ± 0.0092        | 0.2398 ± 0.0157        | 0.2309 ± 0.0285        | 0.2614 ± 0.0234        | 0.2481 ± 0.0133        | 0.2348 ± 0.0113        | 0.2503 ± 0.0251        | 0.2528 ± 0.0269        |
|         | DeepCOP | 0.4890 ± 0.0127        | 0.4454 ± 0.0350        | 0.4348 ± 0.0219        | 0.4347 ± 0.0355        | 0.4213 ± 0.0164        | 0.4950 ± 0.0233        | 0.4648 ± 0.0125        | 0.4713 ± 0.0196        | 0.4925 ± 0.0269        | 0.5001 ± 0.0146        |
|         | CIGER   | <b>0.5425 ± 0.0100</b> | <b>0.5078 ± 0.0344</b> | <b>0.5218 ± 0.0126</b> | <b>0.4652 ± 0.0243</b> | <b>0.5392 ± 0.0389</b> | <b>0.5530 ± 0.0226</b> | <b>0.5026 ± 0.0215</b> | <b>0.5183 ± 0.0045</b> | <b>0.5770 ± 0.0311</b> | <b>0.5543 ± 0.0114</b> |
| P@200   | TT-WOPT | 0.2358 ± 0.0068        | 0.2300 ± 0.0154        | 0.2324 ± 0.0084        | 0.2239 ± 0.0068        | 0.2189 ± 0.0225        | 0.2387 ± 0.0165        | 0.2304 ± 0.0110        | 0.2205 ± 0.0075        | 0.2318 ± 0.0188        | 0.2337 ± 0.0178        |
|         | DeepCOP | 0.4144 ± 0.0080        | 0.3839 ± 0.0253        | 0.3855 ± 0.0155        | 0.3771 ± 0.0260        | 0.3706 ± 0.0101        | 0.4194 ± 0.0164        | 0.3985 ± 0.0101        | 0.4049 ± 0.0138        | 0.4214 ± 0.0170        | 0.4280 ± 0.0140        |
|         | CIGER   | <b>0.4609 ± 0.0080</b> | <b>0.4273 ± 0.0267</b> | <b>0.4465 ± 0.0098</b> | <b>0.3985 ± 0.0169</b> | <b>0.4589 ± 0.0320</b> | <b>0.4680 ± 0.0161</b> | <b>0.4288 ± 0.0170</b> | <b>0.4422 ± 0.0046</b> | <b>0.4894 ± 0.0223</b> | <b>0.4657 ± 0.0084</b> |

Supplemental Table S2. Cell-specific performances (NDCG and Precision@K) of TT-WOPT, DeepCOP, and CIGER for down-regulated gene ranking under 5-fold cross-validation setting.



| Model               | Classification Task    |                        |                        |                        |
|---------------------|------------------------|------------------------|------------------------|------------------------|
|                     | Up-regulated           |                        | Down-regulated         |                        |
|                     | AU-PRC                 | F1                     | AU-PRC                 | F1                     |
| TT-WOPT             | 0.0527 ± 0.0010        | 0.0953 ± 0.0038        | 0.0563 ± 0.0013        | 0.0977 ± 0.0025        |
| Logistic Regression | 0.0848 ± 0.0065        | 0.1437 ± 0.0093        | 0.0961 ± 0.0053        | 0.1588 ± 0.0070        |
| DeepCOP             | 0.1137 ± 0.0096        | 0.1733 ± 0.0078        | 0.1250 ± 0.0114        | 0.1894 ± 0.0126        |
| CIGER               | <b>0.1498 ± 0.0052</b> | <b>0.2226 ± 0.0076</b> | <b>0.1542 ± 0.0082</b> | <b>0.2335 ± 0.0083</b> |

**Supplemental Table S3. Performances (i.e., AU-PRC and F1) of TT-WOPT, Logistic Regression, DeepCOP, and CIGER for up-regulated and down-regulated gene classification under 5-fold cross-validation setting.**

| Up-regulated gene ranking   |                        |                        |                        |                        |                        |
|-----------------------------|------------------------|------------------------|------------------------|------------------------|------------------------|
| Setting                     | NDCG                   | P@10                   | P@50                   | P@100                  | P@200                  |
| Full data                   | 0.7761 ± 0.0029        | 0.4070 ± 0.0028        | 0.3447 ± 0.0042        | 0.3124 ± 0.0085        | 0.2804 ± 0.0091        |
| Filtered data               | <b>0.8275 ± 0.0041</b> | <b>0.5973 ± 0.0170</b> | <b>0.5276 ± 0.0126</b> | <b>0.4735 ± 0.0101</b> | <b>0.4027 ± 0.0077</b> |
| Down-regulated gene ranking |                        |                        |                        |                        |                        |
| Setting                     | NDCG                   | P@10                   | P@50                   | P@100                  | P@200                  |
| Full data                   | 0.7966 ± 0.0049        | 0.4762 ± 0.0164        | 0.4079 ± 0.0173        | 0.3281 ± 0.0235        | 0.3182 ± 0.0136        |
| Filtered data               | <b>0.8460 ± 0.0023</b> | <b>0.6342 ± 0.0120</b> | <b>0.5753 ± 0.0041</b> | <b>0.5250 ± 0.0034</b> | <b>0.4465 ± 0.0035</b> |

**Supplemental Table S4. Average performances (NDCG and Precision@K) of CIGER when training with all gene expression profiles (i.e., full data) and high-quality gene expression profiles (i.e., filtered data) for ranking up-regulated and down-regulated genes under the 5-fold cross-validation setting.**

|                                 | A375      |               | A549      |               | HA1E     |               | HCC515    |               | HELA      |               | HT29     |               | MCF7     |               | PC3      |               | VCAP      |               | YAPC      |               |
|---------------------------------|-----------|---------------|-----------|---------------|----------|---------------|-----------|---------------|-----------|---------------|----------|---------------|----------|---------------|----------|---------------|-----------|---------------|-----------|---------------|
|                                 | Rank      | P@200         | Rank      | P@200         | Rank     | P@200         | Rank      | P@200         | Rank      | P@200         | Rank     | P@200         | Rank     | P@200         | Rank     | P@200         | Rank      | P@200         | Rank      | P@200         |
| Sucralfate                      | <b>4</b>  | <b>0.3150</b> | <b>3</b>  | <b>0.3300</b> | 14       | 0.3200        | <b>4</b>  | <b>0.3400</b> | <b>3</b>  | <b>0.3350</b> | <b>5</b> | <b>0.3700</b> | 11       | 0.3300        | <b>3</b> | <b>0.3250</b> | <b>8</b>  | <b>0.3300</b> | <b>4</b>  | <b>0.3400</b> |
| Inositol Hexaphosphate          | <b>6</b>  | <b>0.3000</b> | <b>4</b>  | <b>0.3200</b> | 13       | 0.3200        | <b>3</b>  | <b>0.3500</b> | 17        | 0.3250        | <b>1</b> | <b>0.3900</b> | <b>3</b> | <b>0.3650</b> | <b>4</b> | <b>0.3200</b> | 19        | 0.3100        | <b>3</b>  | <b>0.3450</b> |
| Ginsenoside B2                  | <b>7</b>  | <b>0.3000</b> | <b>7</b>  | <b>0.3100</b> | <b>2</b> | <b>0.3500</b> | <b>6</b>  | <b>0.3300</b> | <b>4</b>  | <b>0.3350</b> | <b>4</b> | <b>0.3750</b> | <b>7</b> | <b>0.3400</b> | <b>5</b> | <b>0.3150</b> | <b>9</b>  | <b>0.3300</b> | <b>5</b>  | <b>0.3350</b> |
| Madecassoside                   | <b>9</b>  | <b>0.2850</b> | 11        | 0.3000        | <b>6</b> | <b>0.3300</b> | 12        | 0.3250        | <b>5</b>  | <b>0.3350</b> | 13       | 0.3500        | 14       | 0.3250        | 20       | 0.2800        | 15        | 0.3200        | <b>6</b>  | <b>0.3200</b> |
| Ginsenoside Rb1                 | 13        | 0.2800        | <b>10</b> | <b>0.3000</b> | <b>3</b> | <b>0.3400</b> | <b>9</b>  | <b>0.3250</b> | 12        | 0.3300        | 11       | 0.3550        | 15       | 0.3250        | 13       | 0.2900        | 11        | 0.3250        | 20        | 0.3100        |
| Chromium gluconate              | 24        | 0.2400        | 15        | 0.2900        | <b>5</b> | <b>0.3350</b> | <b>10</b> | <b>0.3250</b> | 11        | 0.3300        | 16       | 0.3500        | 12       | 0.3250        | 15       | 0.2850        | <b>10</b> | <b>0.3250</b> | 15        | 0.3100        |
| Sodium ferric gluconate complex | <b>5</b>  | <b>0.3150</b> | <b>5</b>  | <b>0.3100</b> | <b>9</b> | <b>0.3300</b> | 13        | 0.3250        | <b>9</b>  | <b>0.3300</b> | 28       | 0.3350        | <b>9</b> | <b>0.3300</b> | <b>6</b> | <b>0.3050</b> | 12        | 0.3200        | 26        | 0.3000        |
| Betadex                         | <b>10</b> | <b>0.2800</b> | 19        | 0.2850        | 19       | 0.3050        | 32        | 0.3000        | <b>10</b> | <b>0.3300</b> | 39       | 0.3250        | 13       | 0.3250        | <b>8</b> | <b>0.3050</b> | <b>5</b>  | <b>0.3350</b> | <b>10</b> | <b>0.3150</b> |
| Sucrosfate                      | <b>3</b>  | <b>0.3200</b> | <b>2</b>  | <b>0.3450</b> | 11       | 0.3250        | <b>1</b>  | <b>0.3700</b> | <b>2</b>  | <b>0.3500</b> | <b>2</b> | <b>0.3900</b> | <b>1</b> | <b>0.3700</b> | <b>2</b> | <b>0.3400</b> | <b>3</b>  | <b>0.3450</b> | <b>2</b>  | <b>0.3500</b> |

**Supplemental Table S5. Cell-specific ranks and the corresponding Precision@200 scores of pancreatic cancer’s drug candidates calculated from our drug repurposing pipeline. Drugs in top 10 cell-specific evaluations are highlighted.**

|              | A375     |               | A549     |               | HA1E     |               | HCC515   |               | HELA |        | HT29     |               | MCF7      |               | PC3      |               | VCAP     |               | YAPC     |               |
|--------------|----------|---------------|----------|---------------|----------|---------------|----------|---------------|------|--------|----------|---------------|-----------|---------------|----------|---------------|----------|---------------|----------|---------------|
|              | Rank     | GSEA          | Rank     | GSEA          | Rank     | GSEA          | Rank     | GSEA          | Rank | GSEA   | Rank     | GSEA          | Rank      | GSEA          | Rank     | GSEA          | Rank     | GSEA          | Rank     | GSEA          |
| Dipyridamole | <b>2</b> | <b>0.3475</b> | 3198     | 0.3021        | <b>1</b> | <b>0.3565</b> | 72       | 0.3388        | 119  | 0.2667 | 134      | 0.3270        | 23        | 0.2868        | <b>1</b> | <b>0.3921</b> | <b>5</b> | <b>0.4107</b> | <b>1</b> | <b>0.3657</b> |
| Gedatolisib  | 886      | 0.0000        | 4464     | 0.0000        | 496      | 0.2597        | 59       | 0.3429        | 183  | 0.2480 | <b>2</b> | <b>0.3626</b> | 14        | 0.3006        | <b>2</b> | <b>0.3640</b> | <b>8</b> | <b>0.4027</b> | <b>5</b> | <b>0.3449</b> |
| AZD-8055     | 886      | 0.0000        | 3732     | 0.2817        | 524      | 0.2565        | <b>8</b> | <b>0.3770</b> | 98   | 0.2716 | 1891     | 0.2684        | <b>8</b>  | <b>0.3108</b> | 35       | 0.3098        | 11       | 0.4006        | 72       | 0.2935        |
| Linagliptin  | 886      | 0.0000        | 10374    | 0.0000        | 620      | 0.2452        | 21       | 0.3626        | 206  | 0.2415 | 1050     | 0.2916        | 21        | 0.2946        | <b>7</b> | <b>0.3272</b> | 36       | 0.3756        | <b>6</b> | <b>0.3386</b> |
| ZSTK-474     | 814      | 0.1893        | 4168     | 0.2498        | 435      | 0.2704        | <b>7</b> | <b>0.3773</b> | 181  | 0.2483 | 1006     | 0.2936        | 34        | 0.2774        | 37       | 0.3091        | <b>2</b> | <b>0.4214</b> | <b>3</b> | <b>0.3524</b> |
| Biguanide    | 886      | 0.0000        | <b>2</b> | <b>0.4528</b> | 222      | 0.2882        | 2771     | 0.0000        | 687  | 0.1912 | <b>3</b> | <b>0.3604</b> | 946       | 0.0000        | 606      | 0.0000        | 200      | 0.3182        | 791      | 0.0000        |
| CH-5132799   | 886      | 0.0000        | 3503     | 0.2914        | 880      | 0.2294        | <b>6</b> | <b>0.3775</b> | 81   | 0.2771 | 1511     | 0.2776        | <b>10</b> | <b>0.3054</b> | 117      | 0.2863        | 49       | 0.3715        | 73       | 0.2929        |
| Vistusertib  | 886      | 0.0000        | 3627     | 0.2868        | 532      | 0.2555        | <b>5</b> | <b>0.3778</b> | 107  | 0.2701 | 1508     | 0.2776        | <b>6</b>  | <b>0.3185</b> | 49       | 0.3049        | <b>9</b> | <b>0.4012</b> | 90       | 0.2889        |
| Preladenant  | 886      | 0.0000        | 3988     | 0.2658        | 504      | 0.2589        | 94       | 0.3308        | 126  | 0.2650 | 656      | 0.3091        | <b>7</b>  | <b>0.3154</b> | <b>5</b> | <b>0.3342</b> | 16       | 0.3935        | <b>9</b> | <b>0.3338</b> |

**Supplemental Table S6. Cell-specific ranks and the corresponding GSEA scores of pancreatic cancer’s drug candidates calculated from our drug repurposing pipeline. Drugs in top 10 cell-specific evaluations are highlighted.**

| Drug                      | Cat.No       | Company         | Stock concentration (mM) | Working concentration (uM) |
|---------------------------|--------------|-----------------|--------------------------|----------------------------|
| AZD-8055                  | Lot 25910107 | LKT lab         | 40                       | 0.05                       |
| Preladenant (SCH-420814)  | A3735        | APEX BIO        | 40                       | 1                          |
| Linagliptin               | A4034        |                 | 100                      | 100                        |
| Dipyridamole              | B1933        |                 | 100                      | 100                        |
| Metformin                 | 13118        | Cayman Chemical | Prepare fresh            | 20                         |
| Vitamin C (L-sorbic Acid) | A92902-100G  | Sigma-Aldrich   |                          | 100                        |

**Supplemental Table S7. Drugs used for treatments with their stock concentration and working concentration.**

| Antibody type          | Company                | Catalogue number | Dilution                          |
|------------------------|------------------------|------------------|-----------------------------------|
| TET2 primary           | Abcam                  | ab124297         | 1:500                             |
| GATA6 primary antibody |                        | ab22600          | 1:500                             |
| 5hmc                   | Active Motif           | 39769            | 1:1000                            |
| b-actin                | Proteintech            | 60008-1-1g       | 1:1000                            |
| Anti-Rabbit HRP        | Cell Signal Technology | 7074S            | 1:5000                            |
| Anti-Mouse HRP         |                        | 7076S            | 1:5000                            |
| RNAse A                | Thermo Scientific      | EN0531           | 200 µg/ml/1x10 <sup>6</sup> cells |

**Supplemental Table S8. Antibodies and enzyme used for western blot and blot bot with their working dilutions.**

| Buffer type                          | Content/company                                                                                                                                                                                   |                                         | Application                      |
|--------------------------------------|---------------------------------------------------------------------------------------------------------------------------------------------------------------------------------------------------|-----------------------------------------|----------------------------------|
| NuPAGE LDS Sample Buffer (4X)        | NP0008                                                                                                                                                                                            | NuPAGE, Thermo Scientific, Waltham, USA | Western blot                     |
| NuPAGE MOPS SDS Running Buffer (20X) | NP0001-02                                                                                                                                                                                         |                                         |                                  |
| Transfer buffer                      | Glycine 144 g, tris base 30.2 g                                                                                                                                                                   |                                         |                                  |
| Ripa Buffer                          | Thermo Fisher Ref 89900<br>Supplemented with protease inhibitor<br>(Ref 04693116001, Roche, Basel, Switzerland)<br>and phosphate inhibitor (Ref A32957<br>Pierce Thermo Scientific, Waltham, USA) |                                         | Western blot, protein extraction |
| Lysis Buffer                         | 100 mM Tris-HCL [pH8.5], 5 mM EDTA,<br>0.2% SDS, 100mM NaCl, 0.5 mg/ml Proteinase K                                                                                                               |                                         | Dot blot                         |
| Denaturing buffer                    | 200 mM NaOH, 20mM EDTA                                                                                                                                                                            |                                         |                                  |
| TBS-0.1% Tween 20                    | 6.05 Tris 8.76g NaCl, pH 7.6,<br>with 0.1% Tween 20 (Acros Organics Cat 233360010)                                                                                                                |                                         | Dot blot, Western blot           |

**Supplemental Table S9. Buffers and solutions used in western blot and dot blot.**

## Supplemental Figures

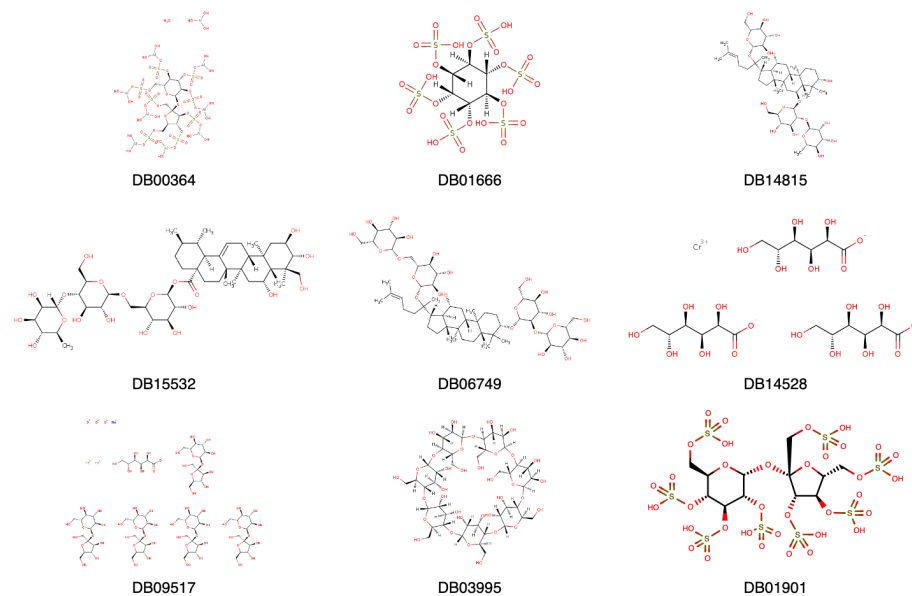

**Supplemental Figure S1.** Molecular structures of drugs selected by our drug screening pipeline (w.r.t. Precision@200) as potential treatments for pancreatic cancer.

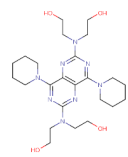

DB00975

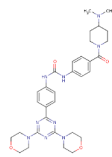

DB11896

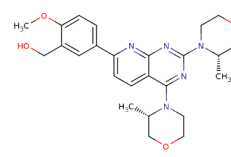

DB12774

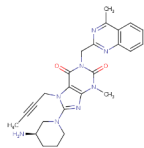

DB08882

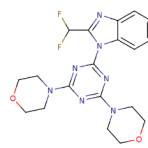

DB12904

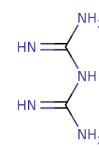

DB13100

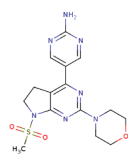

DB13051

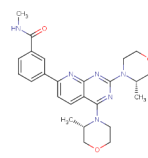

DB11925

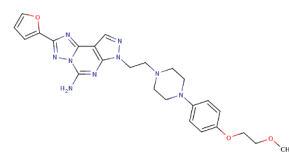

DB11864

Supplemental Figure S2. Molecular structures of drugs selected by our drug screening pipeline (w.r.t. GSEA) as potential treatments for pancreatic cancer.

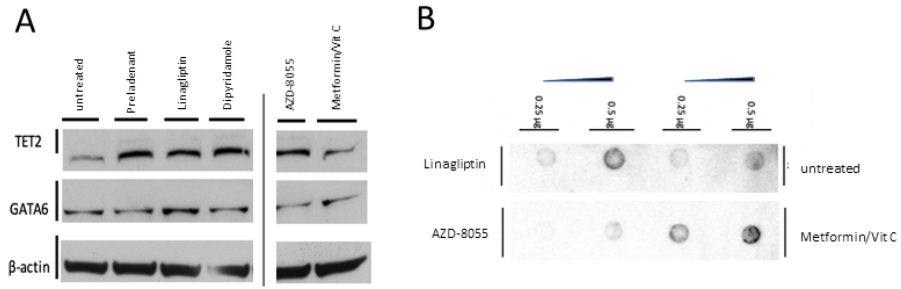

**Supplemental Figure S3. Western blot and dot blot.** (A) Western blot for TET2 and GATA6 level. (B) Dot blot for 5mhc.

## References

1. Duvenaud, D. K., Maclaurin, D., Iparraguirre, J., Bombarell, R., Hirzel, T., Aspuru-Guzik, A., and Adams, R. P. (2015). Convolutional networks on graphs for learning molecular fingerprints. In *Advances in Neural Information Processing Systems*. pp. 2224–2232.
2. Cao, Z., Qin, T., Liu, T.-Y., Tsai, M.-F., and Li, H. (2007). Learning to rank: from pairwise approach to listwise approach. In *Proceedings of the 24th International Conference on Machine Learning*. pp. 129–136.
3. Xia, F., Liu, T.-Y., Wang, J., Zhang, W., and Li, H. (2008). Listwise approach to learning to rank: theory and algorithm. In *Proceedings of the 25th International Conference on Machine Learning*. pp. 1192–1199.
4. Qin, T., Zhang, X.-D., Tsai, M.-F., Wang, D.-S., Liu, T.-Y., and Li, H. (2008). Query-level loss functions for information retrieval. *Information Processing & Management*. 44, 838–855.
5. Burges, C., Shaked, T., Renshaw, E., Lazier, A., Deeds, M., Hamilton, N., and Hullender, G. (2005). Learning to rank using gradient descent. In *Proceedings of the 22nd International Conference on Machine Learning*. pp. 89–96.
6. Jia, Z., Liang, Y., Ma, B., Xu, X., Xiong, J., Duan, L., and Wang, D. (2017). A 5-mC Dot Blot Assay Quantifying the DNA Methylation Level of Chondrocyte Dedifferentiation In Vitro. *Journal of Visualized Experiments: JoVE*. ,.
7. Eyres, M., Lanfredini, S., Xu, H., Burns, A., Blake, A., Willenbrock, F., Goldin, R., Hughes, D., Hughes, S., Thapa, A., Vavoulis, D., Hubert, A., D’Costa, Z., Sabbagh, A., Abraham, A. G., Blancher, C., Jones, S., Verrill, C., Silva, M., Soonawalla, Z., Maughan, T., Schuh, A., Mukherjee, S., and O’Neill, E. (2021). TET2 Drives 5hmc Marking of GATA6 and Epigenetically Defines Pancreatic Ductal Adenocarcinoma Transcriptional Subtypes. *Gastroenterology*. 161, 653–668.e16.
8. Franken, N. A., Rodermond, H. M., Stap, J., Haveman, J., and Van Bree, C. (2006). Clonogenic assay of cells in vitro. *Nature protocols*. 1, 2315–2319.
